# Supplementary material for: Gut Microbiota-Derived TMAO: A Causal Factor Promoting Atherosclerotic Cardiovascular Disease?
Source: MDPI journal article supplement (doi:10.3390/ijms24031940), 2023-01-18
Supplement: s1 [file s1]

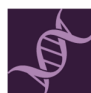

**Table S1.** Additional Prospective studies about TMAO and mortality and other related cardiovascular outcomes.

| Year                               | N   | Follow-Up                    | Outcomes                                        | Covariates in the Adjusted Models                                                                                                                                                                              | HR (95% CI)<br>and p Value                                                                                                                                                                           | Ref. |
|------------------------------------|-----|------------------------------|-------------------------------------------------|----------------------------------------------------------------------------------------------------------------------------------------------------------------------------------------------------------------|------------------------------------------------------------------------------------------------------------------------------------------------------------------------------------------------------|------|
| <i>Acute or stable HF patients</i> |     |                              |                                                 |                                                                                                                                                                                                                |                                                                                                                                                                                                      |      |
| 2014                               | 720 | 5 years                      | All-cause mortality                             | Age, sex, systolic blood pressure, LDL-C, HDL-C, smoking, diabetes mellitus, and BNP<br>* + eGFR                                                                                                               | UA: 3.42 (2.24–5.23) p < 0.001<br>Adj: 1.18 (1.06–1.31) p < 0.01<br>Adj*: 1.75 (1.07–2.86) p < 0.05                                                                                                  | [55] |
| 2015                               | 155 | 5.2 years                    | All-cause mortality                             | NYHA class, age, hypertension, type 2 diabetes, HF etiology, eGFR, CRP, and NT-proBNP                                                                                                                          | UA: 2.24 (1.28–3.92) p = 0.005<br>Adj: 1.79 (0.90–1.79) p = 0.097                                                                                                                                    | [83] |
| 2015                               | 112 | 5 years                      | All-cause mortality and cardiac transplantation | Age, eGFR, mitral septal E/Ea, and NT-proBNP                                                                                                                                                                   | UA: 1.48 (1.10–1.96) p = 0.010<br>Adj: 1.46 (1.03–2.14) p = 0.031                                                                                                                                    | [84] |
| 2019                               | 972 | 1 year<br>2 years<br>3 years | All-cause mortality                             | 1: Age, blood urea, BNP, hemoglobin, and use of beta-blockers at baseline<br>2: model 1 + ischemic etiology, COPD, diastolic blood pressure, and sodium                                                        | UA: 2.43 (1.93–3.05) p < 0.001<br>1: 1.51 (1.14–2.00) p = 0.004<br>2: 1.40 (1.03–1.89) p = 0.030<br>UA: 2.29 (1.90–2.77) p < 0.001<br>1: 1.49 (1.18–1.88) p = 0.001<br>2: 1.44 (1.12–1.84) p = 0.004 | [85] |
|                                    |     |                              |                                                 | 1: age, previous HF hospitalization, peripheral edema, systolic blood pressure, BNP (log-transformed), hemoglobin, sodium, and use of beta-blockers at baseline<br>2: model 1 + current smoker, COPD, and eGFR | UA: 2.27 (1.90–2.72) p < 0.001<br>1: 1.47 (1.18–1.84) p = 0.001<br>2: 1.42 (1.13–1.80) p = 0.003                                                                                                     |      |
|                                    |     |                              |                                                 |                                                                                                                                                                                                                | UA: 1.92 (1.61–2.28) p < 0.001<br>1: 1.42 (1.06–1.90) p = 0.019<br>2: 1.12 (0.90–1.40) p = 0.281                                                                                                     |      |
|                                    |     |                              |                                                 |                                                                                                                                                                                                                | UA: 1.91 (1.64–2.22) p < 0.001<br>1: 1.39 (1.09–                                                                                                                                                     |      |

|                     |      |           |                                                        |                                                                                                       |                                                                                                                                                                                                       |      |
|---------------------|------|-----------|--------------------------------------------------------|-------------------------------------------------------------------------------------------------------|-------------------------------------------------------------------------------------------------------------------------------------------------------------------------------------------------------|------|
|                     |      |           |                                                        |                                                                                                       | 1.76) p = 0.007<br>2: 1.19 (0.98–1.45) p = 0.077<br>UA: 1.93 (1.66–2.23) p < 0.001<br>1: 1.37 (1.09–1.72) p = 0.007<br>2: 1.21 (1.00–1.46) p = 0.054                                                  |      |
| 2021                | 806  | 1 year    | All-cause mortality<br>Death/HF                        | Sex, age, previous medical history HF, ischemic heart disease, hypertension, and diabetes mellitus    | Adj: 1.26 (1.08–1.47) p = 0.004<br>Adj: 1.25 (1.09–1.42) p = 0.001                                                                                                                                    | [86] |
| <i>T2D patients</i> |      |           |                                                        |                                                                                                       |                                                                                                                                                                                                       |      |
| 2017                | 1216 | 3 years   | MACE                                                   | Age, sex, history of CVD, SBP, LDL-C, HDL-C, smoking, hsCRP, HbA1c, eGFR, BMI, and history of HF      | UA: 3.03 (2.08–4.42) p < 0.001<br>Adj: 1.94 (1.23–3.05) p < 0.01                                                                                                                                      | [87] |
|                     |      | 5 years   | All-cause mortality                                    |                                                                                                       | UA: 3.63 (2.53–5.21) p < 0.001<br>Adj: 1.85 (1.21–2.84) p < 0.01                                                                                                                                      |      |
| 2020                | 1463 | 7 years   | MACE                                                   | Sex, age, and personal history of MI, eGFR, urine albumin-to-creatinine ratio, and NT-proBNP          | UA: 2.91 (2.18–3.89) p < 0.001<br>Adj: 1.32 (1.02–1.70) p = 0.032                                                                                                                                     | [88] |
|                     |      |           | All-cause mortality                                    | Sex, age, sinus rhythm, SBP, ANGPTL2, and sTNFR1                                                      | UA: 2.52 (1.98–3.21) p < 0.001<br>Adj: 1.16 (0.95–1.42) p = 0.151                                                                                                                                     |      |
| 2021                | 311  | 6.5 years | All-cause mortality<br>Cardiovascular mortality<br>CVD | Age, sex, HbA1c, systolic blood pressure, body mass index, total cholesterol, smoking, UAER, and eGFR | UA: 1.06 (0.88–1.28) p = 0.53<br>Adj: 1.02 (0.83–1.26) p = 0.85<br>UA: 1.09 (0.82–1.45) p = 0.54<br>Adj: 0.98 (0.70–1.37) p = 0.92<br>UA: 1.14 (0.96–1.35) p = 0.14<br>Adj: 1.11 (0.93–1.33) p = 0.26 | [89] |
| 2022                | 1468 | 7.3 years | Cardiovascular mortality                               | Age, sex, eGFR, and uACR                                                                              | UA: 1.20 (1.10–1.31) p < 0.0001<br>Adj: NOT                                                                                                                                                           | [90] |

|                                                                                                                                                                             |     |           |                                             |                                                                                                                                                                                                                                                                                    |                                                                                                                                   | SIGNIFICANT |
|-----------------------------------------------------------------------------------------------------------------------------------------------------------------------------|-----|-----------|---------------------------------------------|------------------------------------------------------------------------------------------------------------------------------------------------------------------------------------------------------------------------------------------------------------------------------------|-----------------------------------------------------------------------------------------------------------------------------------|-------------|
| <i>PAD patients</i>                                                                                                                                                         |     |           |                                             |                                                                                                                                                                                                                                                                                    |                                                                                                                                   |             |
| 2016                                                                                                                                                                        | 935 | 5 years   | All-cause mortality                         | 1: age, sex, systolic blood pressure, low-density lipoprotein cholesterol, high-density lipoprotein cholesterol, smoking, and diabetes mellitus<br>2: model 1 + hsCRP and eGFR<br>3: model 2 + history of CAD, statin use, apolipoprotein A1, apolipoprotein B and myeloperoxidase | UA: 2.69 (1.82-3.97) p<0.001<br>1: 2.06 (1.36-3.11) p<0.001<br>2: 1.59 (1.03-2.45) p<0.05<br>3: 1.88 (1.21-2.92) p<0.001          | [91]        |
| 2019                                                                                                                                                                        | 262 | 4 years   | All-cause mortality                         | 1: sex, age, smoking, diabetes mellitus, hypertension, dyslipidemia, HDL-C, eGFR                                                                                                                                                                                                   | UA: 1.30 (1.13-1.46) p < 0.001<br>1: 1.09 (0.94-1.26) p = 0.236                                                                   |             |
|                                                                                                                                                                             |     |           | Cardiovascular mortality                    | 1: sex, age, and hs-CRP<br>2: diabetes mellitus, HT, and eGFR<br>3: smoking, dyslipidemia, HDL-C                                                                                                                                                                                   | UA: 1.52 (1.27-1.83) p < 0.001<br>1: 1.39 (1.13-1.70) p = 0.001<br>2: 1.29 (1.05-1.60) p = 0.015<br>3: 1.52 (1.27-1.82) p < 0.001 | [92]        |
| <i>Carotid stenosis patients</i>                                                                                                                                            |     |           |                                             |                                                                                                                                                                                                                                                                                    |                                                                                                                                   |             |
| 2016                                                                                                                                                                        | 264 | 5.3 years | Vascular mortality (MI or stroke)           | Age and eGFR                                                                                                                                                                                                                                                                       | UA: 1.81 (1.29-2.53) p = 0.001<br>Adj: 0.91-2.08) p = 0.129                                                                       | [93]        |
| <i>Hemodialysis patients</i>                                                                                                                                                |     |           |                                             |                                                                                                                                                                                                                                                                                    |                                                                                                                                   |             |
| 2015                                                                                                                                                                        | 235 | 4 years   | All-cause mortality                         |                                                                                                                                                                                                                                                                                    | UA: 0.61 (0.38-0.97) p = 0.04<br>Adj: 1.14 (0.67-1.93) p = 0.62                                                                   |             |
|                                                                                                                                                                             |     |           | Cardiovascular mortality or hospitalization | Prealbumin, race, and diabetes                                                                                                                                                                                                                                                     | UA: 0.71 (0.32-1.59) p = 0.40<br>Adj: 0.92 (0.40-2.10) p = 0.84                                                                   | [94]        |
| 2020                                                                                                                                                                        | 252 | 6.1       | All-cause mortality                         | Age, SBP, CHD, diabetes, cerebral infarction, cerebral hemorrhage, gout, calcium supplement, active vitamin D, albumin, prealbumin, hemoglobin, iron, hs-CRP                                                                                                                       | UA: 1.12 (1.07-1.18) p < 0.001<br>Adj: 1.14 (1.08-1.21) p < 0.001                                                                 |             |
|                                                                                                                                                                             |     |           | Cardiovascular mortality                    |                                                                                                                                                                                                                                                                                    | UA: 1.13 (1.03-1.24) p = 0.01<br>Adj: 1.18 (1.07-1.29) p = 0.001                                                                  | [95]        |
| Adj: adjusted; ANGPTL2: angiopoietin like 2; BNP: brain natriuretic peptide; BMI: body mass index; CAD: coronary artery disease; CHD: coronary heart disease; COPD: chronic |     |           |                                             |                                                                                                                                                                                                                                                                                    |                                                                                                                                   |             |

obstructive pulmonary disease; CVD: cardiovascular disease; eGFR: estimated glomerular filtration rate; HbA1c: hemoglobin A 1 c; HDL-C: high density lipoprotein cholesterol; HF: heart failure; HR: hazard-ratio; hsCRP: high sensitivity C reactive protein; HT: hypertension; LDL-C: low density lipoprotein cholesterol; MACE: major adverse cardiovascular event; MI: myocardial infarction; NT-proBNP: N-terminal pro b-type natriuretic peptide; NYHA: New York Heart Association; PAD: peripheral artery disease; SBP: systolic blood pressure; sTNFR1: soluble tumor necrosis factor receptor-1; TG: triglycerides; T2D: type 2 diabetes; UA: unadjusted; uACR: urine albumin-creatinine ratio; UAER: urinary albumin excretion rate.
